# Supplementary material
Source: PubMed Central journal article supplement (PMC5011063)
Supplement: mmc1.pdf [file mmc1.pdf]

**The American Journal of Human Genetics, Volume 99**

**Supplemental Data**

**Rare Inherited and De Novo CNVs Reveal Complex**

**Contributions to ASD Risk in Multiplex Families**

**Virpi M. Leppa, Stephanie N. Kravitz, Christa Lese Martin, Joris Andrieux, Cedric Le Caignec, Dominique Martin-Coignard, Christina DyBuncio, Stephan J. Sanders, Jennifer K. Lowe, Rita M. Cantor, and Daniel H. Geschwind**

**Figure S1. CNV Characteristics by Array**

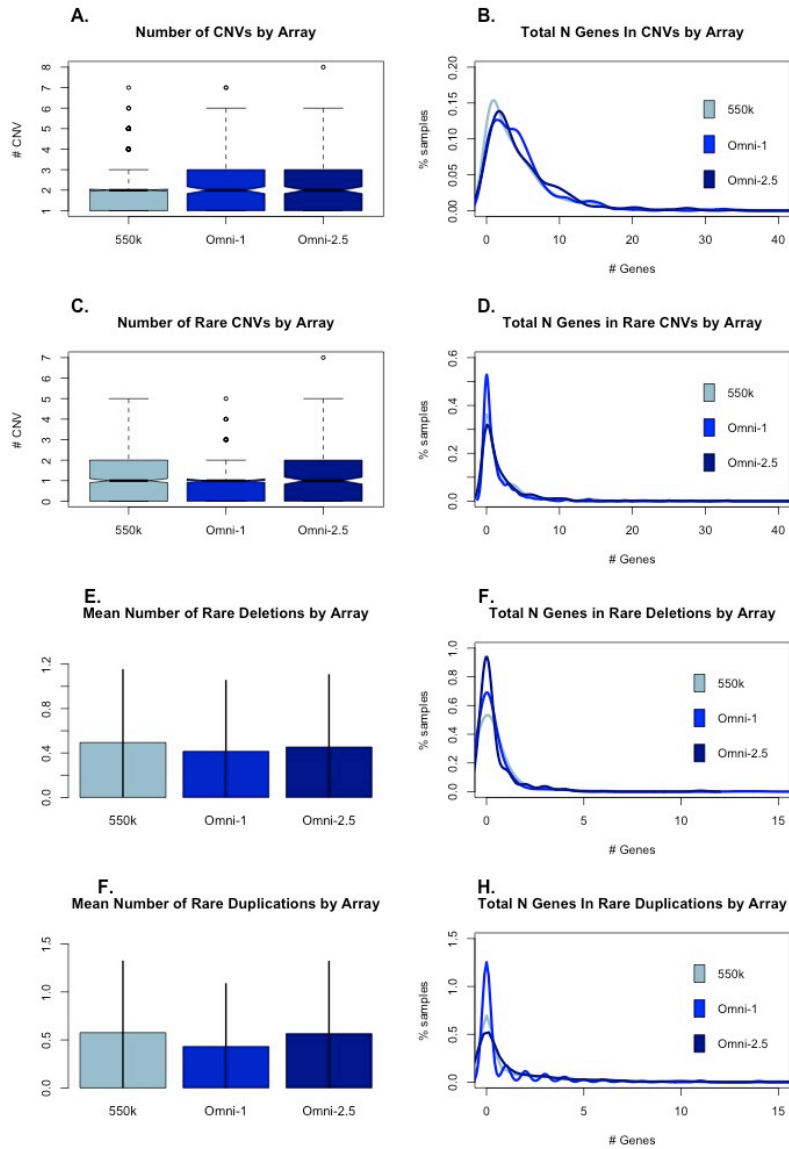

The overall number of CNVs and rare CNVs per individual differs between arrays, and there are subtle differences in the number of genes that overlap CNVs in each category. The differences can be due to multiple different reasons, including array probe density and location, batch effects from reagents, ethnicity and population structures that are

confounded with array and batch. The figure includes only data from parents to minimize potential noise from the affection status.

Figure S2. AGRE CNVs in the *WWOX* locus

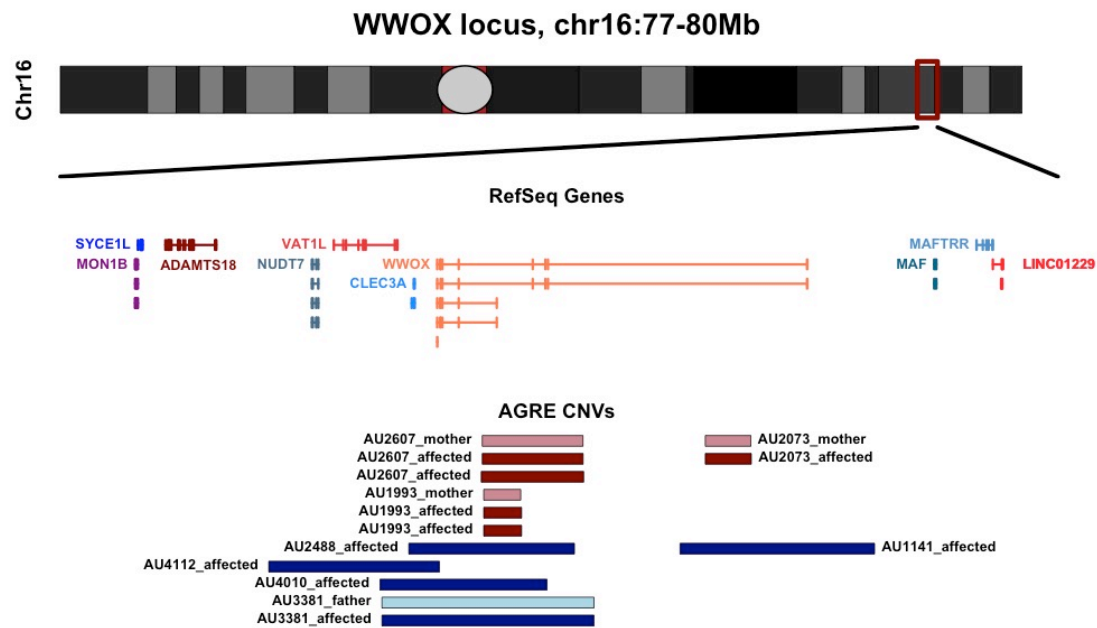

There are no CNVs in siblings that overlap the *WWOX* in the AGRE. All CNVs with known mode of inheritance (both parents available) are inherited. Deletions are shown in dark red for affected children and in pink for parents. Duplications are shown in dark blue for affected children and light blue for parents. Centromere on chr16 is depicted as a grey circle on a red background. Genes in

**Figure S3. AGRE families with non-segregation of autism and 1q21.1 CNVs.**

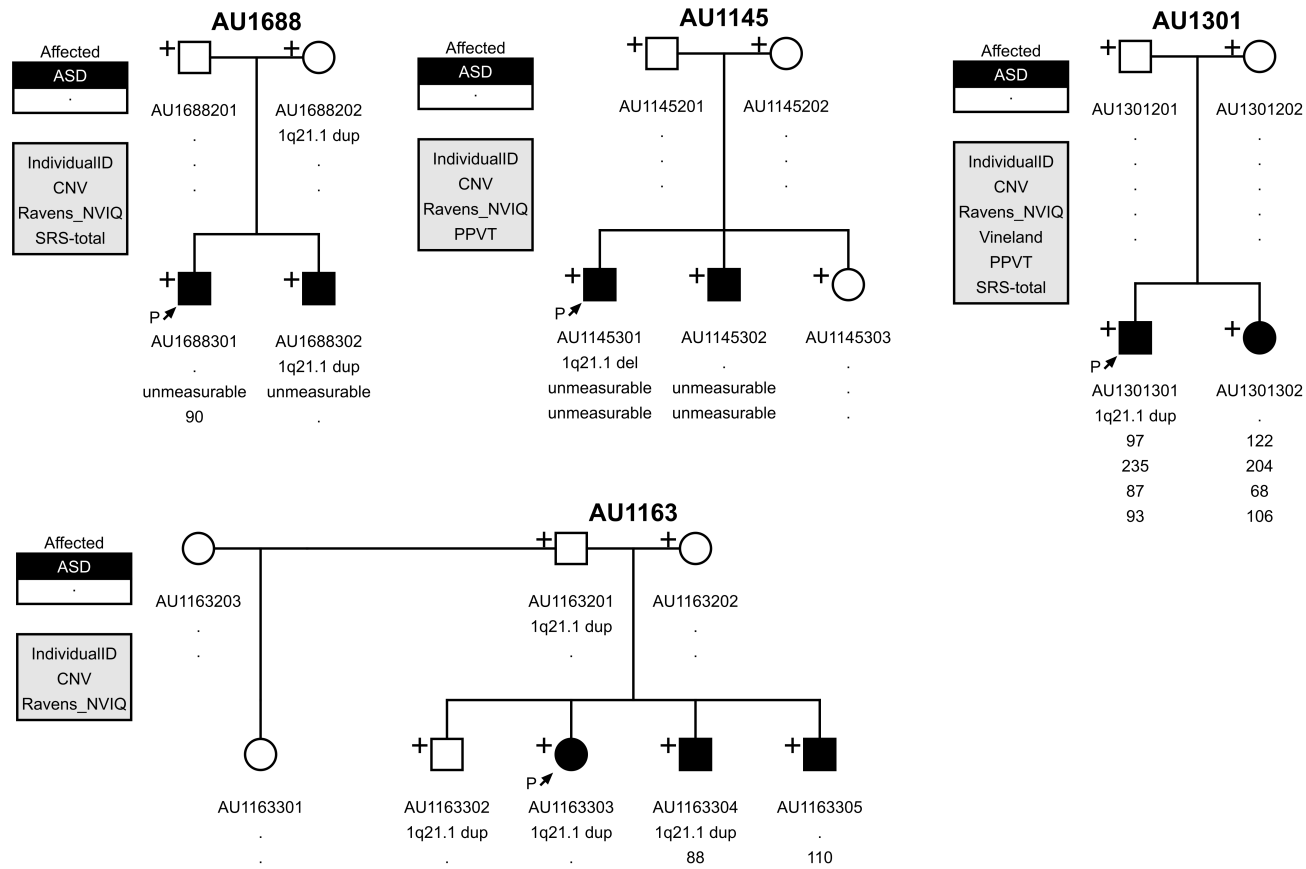

We discovered 30 families with a pathogenic CNV and available genetic information on two or more affected children. Twenty-two of the families had non-segregation of autism and the pathogenic CNV: at least one another affected child didn't carry the pathogenic CNV. This figure depicts families with the 1q21.1 deletions and duplications in some, but not all affected individuals. The pedigrees include information about the CNV (locus and deletion/duplication status) and additional information on Ravens non-verbal IQ, Social Responsiveness Scale, Stanford-Binet Intelligence Scale, Vineland adaptive behavior scale and Peabody Picture Vocabulary test, depending on availability.

We used a simple Bayesian likelihood calculation to estimate, how likely is the observed pattern of inheritance of pathogenic CNVs in data under the current best estimate of inheritance model, a single dominant factor (Gaugler et al. 2014). In our simple test, the alternative model covers all other possible models. For simplicity, we assumed full penetrance for each ASD-associated CNV, although the penetrance estimates ranged from 0.3 to 1 (on average 0.7) in the AGRE data and the recently published Simons Simplex Collection data (Sanders et al. 2015). We used three different sets of priors: family likely true with 0.9, 0.7 and 0.5 probability under the autosomal dominant model. We calculated the likelihood for each family under these assumptions and for each family we replaced the priors with the posterior probabilities from the last step. Changing the priors didn't change the final result in any meaningful way.

+ indicates individuals with available genetic information

**Figure S4. An AGRE family with non-segregation of autism and the 5q35 deletion.**

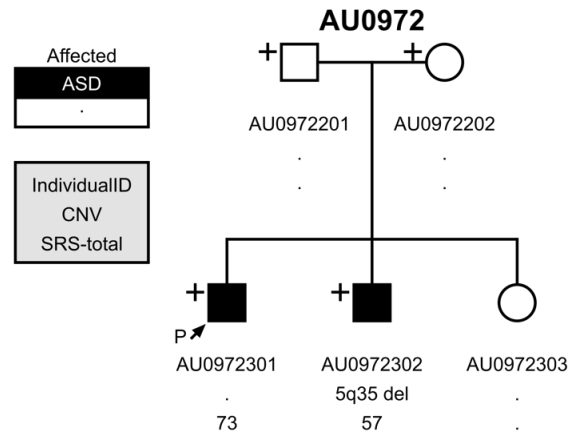

This figure depicts a family with the 5q35 deletion in one, but not the other affected individual. The pedigree includes information about the CNV and additional information on Social Responsiveness Scale for each family member, when available.

+ indicates individuals with available genetic information

**Figure S5. AGRE families with non-segregation of autism and CNVs in the 15q11-13 locus.**

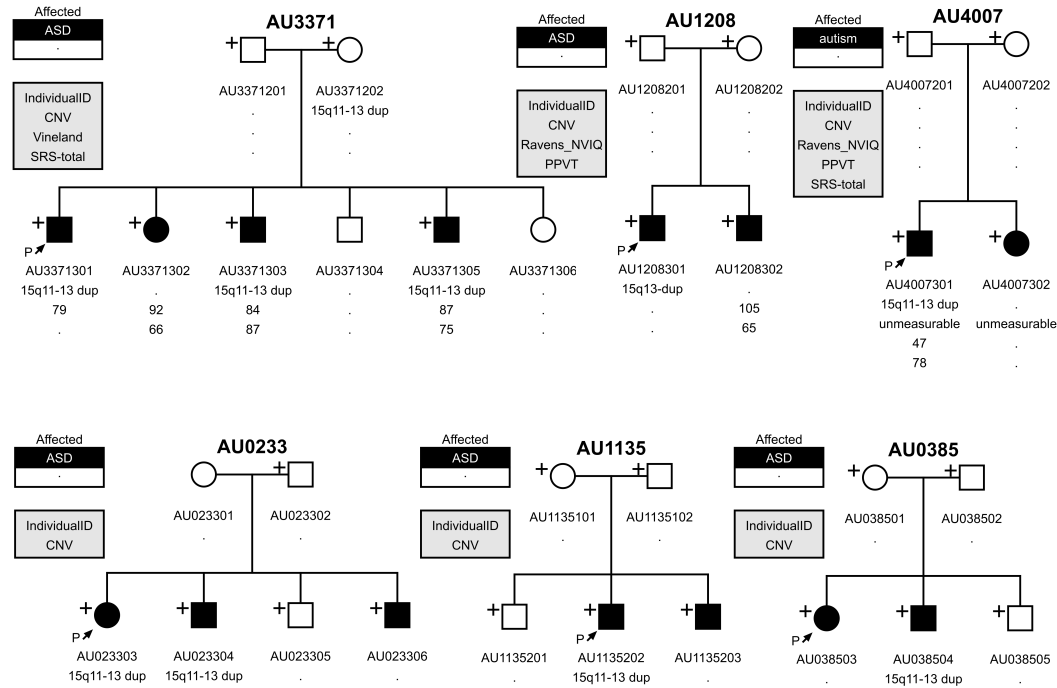

This figure depicts families with duplications in the 15q11-13 locus in some, but not all affected individuals. The pedigrees include information about the duplication carrier status and additional information on Ravens non-verbal IQ, Social Responsiveness Scale, Vineland adaptive behavior scale and Peabody Picture Vocabulary test, depending on availability.

+ indicates individuals with available genetic information



**Figure S6. AGRE families with non-segregation of autism and CNVs in the 16p11.2 locus.**

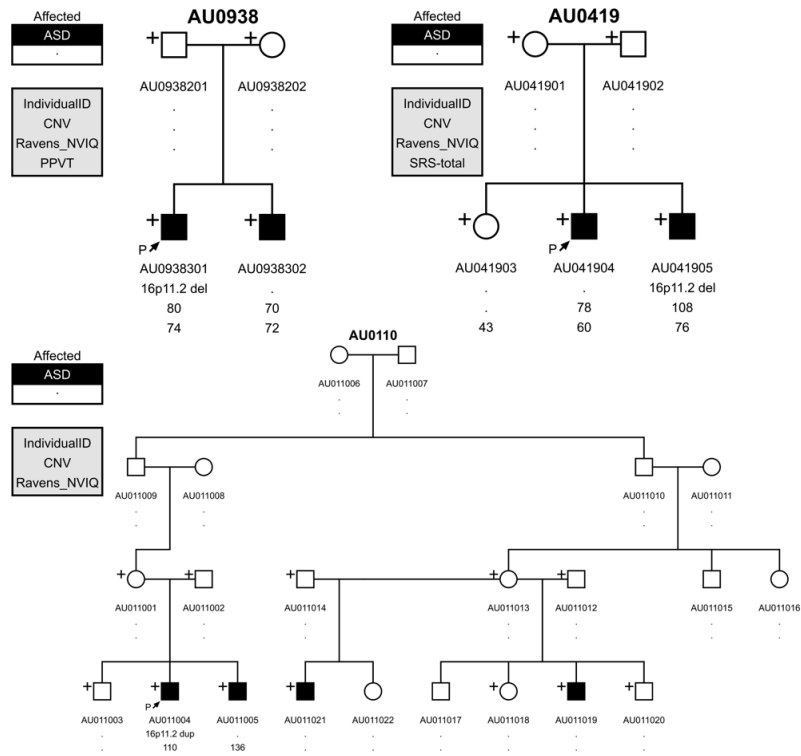

This figure depicts families with CNVs in the 16p11.2 locus in some, but not all affected individuals. The pedigrees include information about the CNV (locus and deletion/duplication status) and additional information on Ravens non-verbal IQ, Social Responsiveness Scale, and Peabody Picture Vocabulary test, depending on availability.

+ indicates individuals with available genetic information

**Figure S7. AGRE families with non-segregation of autism and duplications in the classic 22q11.2 locus.**

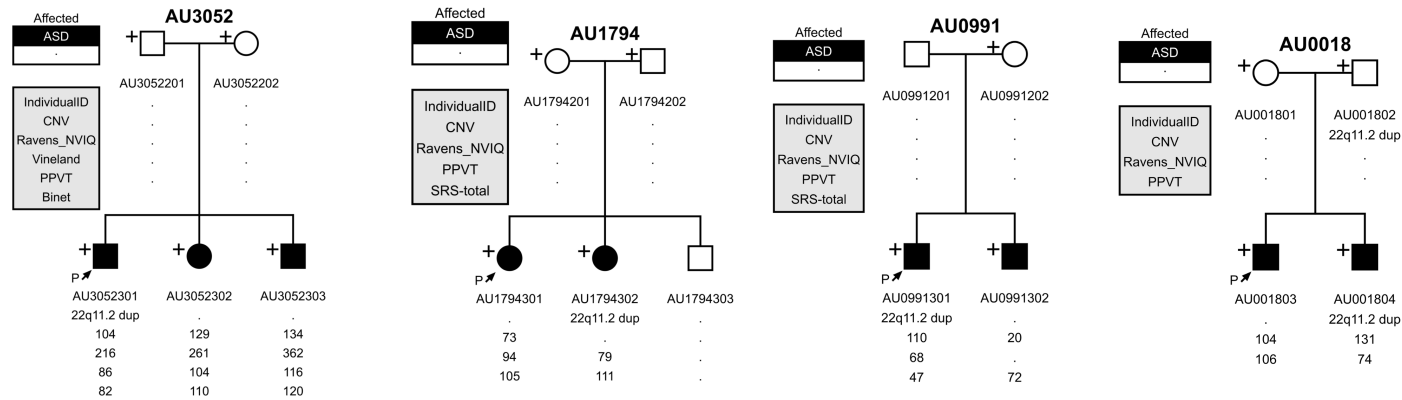

This figure depicts families with duplications in the classic 22q11.2 locus in some, but not all affected individuals. The pedigrees include information about the duplication carrier status and additional information on Ravens non-verbal IQ, Social Responsiveness Scale, Stanford-Binet Intelligence Scale, Vineland adaptive behavior scale and Peabody Picture Vocabulary test, depending on availability.

+ indicates individuals with available genetic information

**Figure S8. AGRE families with non-segregation of autism and duplications in the distal 22q11.2 locus.**

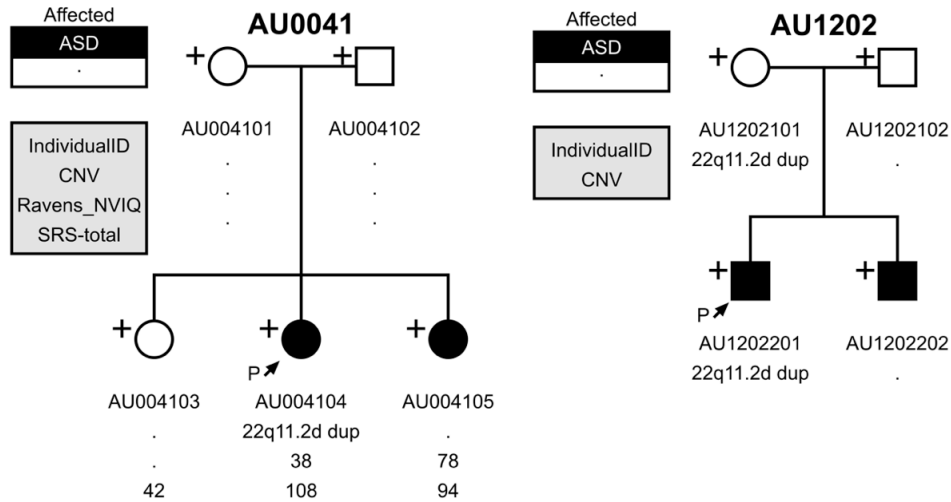

This figure depicts families with duplications in the distal 22q11.2 locus in some, but not all affected individuals. The pedigrees include information about the CNV (locus and deletion/duplication) and additional information on Ravens non-verbal IQ and Social Responsiveness Scale.

+ indicates individuals with available genetic information

**Figure S9. An AGRE family with non-segregation of autism and a duplication in the 17q12 locus.**

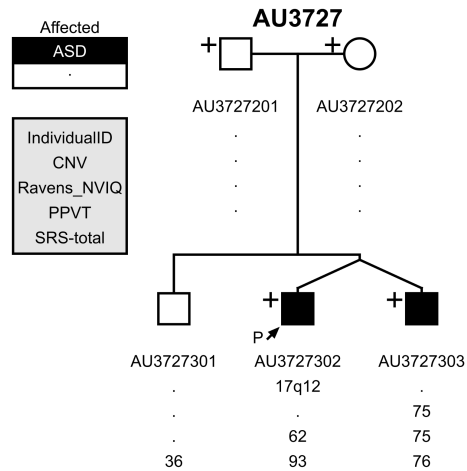

This figure depicts a family with a *de novo* duplication in the 17q12 locus in one, but not both affected individuals. The pedigree includes the duplication carrier status and additional information on Ravens non-verbal IQ, Peabody Picture Vocabulary test and Social Responsiveness Scale.

+ indicates individuals with available genetic information

**Table S1. Sample QC overview by genotyping set.**

| Set                      | Total samples | Total families   | Removed <sup>a</sup> | Samples remaining | Families remaining | Included in previous CNV studies |
|--------------------------|---------------|------------------|----------------------|-------------------|--------------------|----------------------------------|
| 550k.v3,v.1 <sup>a</sup> | 4013          | 941 <sup>b</sup> | 995 (23%)            | 2974              | 895 <sup>b</sup>   | Yes <sup>c</sup>                 |
| Omni-1 A                 | 963           | 250 <sup>b</sup> | 95 (7%)              | 871               | 248 <sup>b</sup>   | No                               |
| Omni-1 B                 | 191           | 82               | 21 (4%)              | 170               | 69                 | No                               |
| Omni-1 C                 | 111           | 34 <sup>b</sup>  | 14 (10%)             | 97                | 33 <sup>b</sup>    | No                               |
| Omni-2.5                 | 1019          | 285 <sup>b</sup> | 61 (5%)              | 958               | 281 <sup>b</sup>   | No                               |
| <b>Total</b>             | <b>6197</b>   | <b>1592</b>      | <b>1186</b>          | <b>5100</b>       | <b>1526</b>        |                                  |

The sample set before and after QC.

<sup>a</sup> Number of samples removed for bad quality arrays, sex chromosome discrepancies or extremely high copy number

<sup>b</sup> Sample sets have overlapping families due to re-genotyping after a sample failure or missing biomaterials at the first genotyping time.

<sup>c</sup> These samples have been a part of previous studies by Girirajan et al. 2013, Matsunami et al. 2013, Miller et al. 2009, Bucan et al. 2009 and Glessner et al. 2009, and 74 families have also been included in the AGP CNV publications by Pinto et al. 2010 and 2014 (Bucan et al., 2009, Girirajan et al., 2013, Glessner et al., 2009, Matsunami et al., 2013, Miller et al., 2009, Moreno-De-Luca et al., 2013, Morrow et al., 2008, Pinto et al., 2014, Pinto et al., 2010).

**Table S2. Batch Effect within different CNV categories**

| Category                                 | p-value, all data        | p-value, multiplex families |
|------------------------------------------|--------------------------|-----------------------------|
| Total number of                          |                          |                             |
| CNVs                                     | 1.052 x 10 <sup>-6</sup> | 0.0004059                   |
| Rare CNVs                                | 8.267 x 10 <sup>-5</sup> | 0.004966                    |
| Rare deletions                           | 0.01826                  | 0.11                        |
| Rare duplications                        | 0.05353                  | 0.2029                      |
| Rare ≥500kb CNVs                         | 0.5419                   | 0.617                       |
| Rare <i>de novo</i>                      | 0.3036                   | 0.7596                      |
| Rare ≥500kb <i>de novo</i>               | 0.4851                   | 0.923                       |
| Genes in CNVs                            | 0.1615                   | 0.07789                     |
| Genes in rare CNVs                       | 0.006832                 | 0.03195                     |
| Genes in rare deletions                  | 0.03202                  | 0.02658                     |
| Genes in rare duplications               | 0.01406                  | 0.0639                      |
| Genes in rare ≥ 500kb CNVs               | 0.6092                   | 0.7165                      |
| Genes in rare <i>de novo</i> CNVs        | 0.3163                   | 0.6385                      |
| Genes in rare ≥500kb <i>de novo</i> CNVs | 0.489                    | 0.9247                      |
| Percentage of samples with               |                          |                             |
| Rare CNV                                 | 0.0002625                | 0.01438                     |
| Rare ≥500kb CNVs                         | 0.5481                   | 0.6259                      |
| Rare <i>de novo</i>                      | 0.3019                   | 0.7612                      |
| Rare ≥500kb <i>de novo</i>               | 0.4845                   | 0.9232                      |
| Rare gene containing CNV                 | 0.006047                 | 0.01182                     |
| Rare gene containing <i>de novo</i>      | 0.3162                   | 0.6391                      |
| Rare large gene containing CNV           | 0.6507                   | 0.7579                      |

The Kruskal-Wallis non-parametric test was used to assess the existence of batch or set effect in the AGRE data set. We used one affected per family and one unaffected sibling, if available.

**Table S5. Overview of results by CNV and array type**

|                                 | All samples: |      |           |      | OR (95% CI)    | P    | Multiplex families |      |           |      | OR             | P     |
|---------------------------------|--------------|------|-----------|------|----------------|------|--------------------|------|-----------|------|----------------|-------|
|                                 | Aff          | %    | Unaff     | %    |                |      | Aff                | %    | Unaff     | %    |                |       |
| Large >500kb, rare CNVs         |              |      |           |      |                |      |                    |      |           |      |                |       |
| % with ≥1                       | 147/1123     | 13.1 | 36/406    | 8.9  | 1.7 (1.3-2.1)  | 0.01 | 114/878            | 13.0 | 23/279    | 8.4  | 1.6 (1.2-1.9)  | 0.022 |
| % with genic                    | 133/1123     | 11.8 | 33/406    | 8.1  | 1.6 (1.2-2.0)  | 0.03 | 104/878            | 11.8 | 20/279    | 7.2  | 1.5 (1.1-1.9)  | 0.031 |
| % with <i>de novo</i>           | 25/1033      | 2.4  | 3/286     | 1.0  | 2.4 (0.7-12.2) | ns   | 21/896             | 2.3  | 1/200     | 0.5  | 4.7 (0.8-198)  | ns    |
| % with inherited                | 102/852      | 7.1  | 21/295    | 7.1  | 1.4 (1.0-1.8)  | ns   | 84/695             | 12.1 | 12/216    | 7.9  | 1.5 (1.0-1.9)  | ns    |
| mean number of, ±SD             | 0.14±0.37    |      | 0.10±0.34 |      | 1.5 (1.1 -1.8) | 0.03 | 0.14±0.37          |      | 0.09±0.33 |      | 1.5 (1.1-1.8)  | 0.05  |
| All rare, <i>de novo</i> CNVs   |              | %    |           | %    |                |      |                    | %    |           | %    |                |       |
| % with ≥1                       | 56/1033      | 5.4  | 16/286    | 5.6  | 1.0 (0.9-1.1)  | ns   | 48/896             | 5.4  | 11/200    | 5.5  | 1.1 (0.4-1.9)  | ns    |
| % with genic                    | 49/1033      | 4.7  | 15/286    | 5.2  | 0.9 (0.3-1.5)  | ns   | 41/896             | 4.6  | 10/200    | 5.0  | 1.0 (0.3-1.7)  | ns    |
| Total kb, ±SD                   | 59±460       |      | 25±185    |      | 1.3 (0.9-1.8)  | ns   | 57±429             |      | 33±223    |      | 1.2 (0.8-1.7)  | ns    |
| Number of genes in, ±SD         | 0.88±7.6     |      | 0.22±1.07 |      | 1.00 (1.0-1.1) | ns   | 0.88±7.3           |      | 0.29±1.27 |      | 1.00 (1.0-1.1) | ns    |
| All rare, <i>inherited</i> CNVs |              | %    |           | %    |                |      |                    | %    |           | %    |                |       |
| % with ≥1                       | 577/852      | 67.7 | 188/295   | 63.7 | 1.2 (1.0-1.4)  | ns   | 465/695            | 66.9 | 143/216   | 66.5 | 1.1 (0.8-1.4)  | ns    |
| Mean # CNV, ±SD                 | 0.95±0.85    |      | 0.93±0.93 |      | 1.0 (0.9-1.2)  | ns   | 0.94±0.85          |      | 0.97±0.93 |      | 1.0 (0.9-1.2)  | ns    |
| Mean # deletions, ±SD           | 0.45±0.61    |      | 0.43±0.63 |      | 1.1 (0.9-1.3)  | ns   | 0.45±0.61          |      | 0.41±0.63 |      | 1.2 (1.0-1.4)  | ns    |
| Mean # duplications, ±SD        | 0.50±0.68    |      | 0.50±0.70 |      | 0.9 (0.8-1.1)  | ns   | 0.50±0.74          |      | 0.56±0.74 |      | 0.9 (0.7-1.1)  | ns    |
| % with genic                    | 457/852      | 53.6 | 146/295   | 49.5 | 1.2 (0.9-1.4)  | ns   | 365/695            | 52.5 | 113/216   | 52.3 | 1.1 (0.8-1.4)  | ns    |
| Total kb, ±SD                   | 296±580      |      | 229±371   |      | 1.0 (1.0-1.0)  | ns   | 300±619            |      | 243±391   |      | 1.0 (1.0-1.0)  | ns    |
| Number of genes in, ±SD         | 2.7±9.5      |      | 2.1±4.5   |      | 1.0 (1.0-1.0)  | ns   | 2.8±10.9           |      | 2.3±4.7   |      | 1.0 (1.0-1.0)  | ns    |
| All rare CNVs                   |              | %    |           | %    |                |      |                    | %    |           | %    |                |       |
| % with ≥1                       | 778/1123     | 69.3 | 265/406   | 65.3 | 1.1 (0.9-1.4)  | ns   | 606/878            | 69.0 | 190/279   | 68.1 | 1.2 (1.0-1.5)  | ns    |
| % with ≥1 genic                 | 581/1123     | 50.8 | 194/406   | 47.8 | 1.1 (0.9-1.3)  | 0.04 | 449/878            | 51.1 | 141/279   | 50.5 | 1.2 (1.0-1.5)  | ns    |
| % with inherited rare           | 577/852      | 67.7 | 188/295   | 63.7 | 1.2 (1.0-1.4)  | ns   | 458/695            | 66.9 | 143/216   | 66.5 | 1.1 (0.8-1.4)  | ns    |
| Mean total #, ±SD               | 1.00±0.87    |      | 0.95±0.95 |      | 1.00 (0.9-1.1) | ns   | 1.00±0.87          |      | 0.98±0.93 |      | 1.02 (0.8-1.2) | ns    |
| Mean total # deletions, ±SD     | 0.49±0.64    |      | 0.46±0.67 |      | 1.00 (0.8-1.2) | ns   | 0.49±0.65          |      | 0.47±0.67 |      | 1.0 (0.8-1.2)  | ns    |
| Mean total # duplications, ±SD  | 0.51±0.68    |      | 0.49±0.69 |      | 1.00 (0.8-1.2) | ns   | 0.51±0.69          |      | 0.52±0.70 |      | 0.9 (0.7-1.1)  | ns    |
| Mean total # genes, ±SD         | 3.4±12.3     |      | 2.3±4.5   |      | 1.0 (1.0-1.0)  | ns   | 3.5±12.6           |      | 2.4±4.4   |      | 1.00 (1.0-1.0) | ns    |
| Mean total length (kb), ±SD     | 357±754      |      | 269±428   |      | 1.3 (1.1-1.6)  | 0.03 | 356±740            |      | 288±459   |      | 1.2 (1.0-1.5)  | ns    |



All results were calculated as each genotyping set as its own strata. Analyses for frequencies were done using general linear model with binomial distribution. The OR and 95% CI for averages were estimated from logistic regression model effect sizes and standard errors. Due to the variable family structures, the number of available samples for different types of analyses varied. The frequencies are reported as family based, one family contributing maximum of one additional value to the affected or unaffected sample column.

**Table S9. 2q24.1 deletions in AGRE, DECIPHER and ClinGen.**

| <b>Set</b> | <b>ID</b>   | <b>Deletion</b> | <b>Inheritance</b> | <b>Phenotype</b>                                                |
|------------|-------------|-----------------|--------------------|-----------------------------------------------------------------|
| AGRE       | AU1778303   | 1Mb             | <i>de novo</i>     | Non-verbal, extremely low IQ, ASD                               |
| AGRE       | AU3566301   | 3.3Mb           | <i>de novo</i>     | Language impairment, low IQ, reported mild ID, seizures, ASD    |
| ClinGen    | Nssv1602827 | 4.6Mb           | n/a                | Delayed speech, ID, ADD, ASD                                    |
| DECIPHER   | 254867      | 2.2Mb           | <i>de novo</i>     | Delayed language development, macrocephaly, Sotos-like behavior |
| DECIPHER   | 290757      | 170kb           | <i>de novo</i>     | Delayed language development, behavioral/cognitive disorders    |
| DECIPHER   | 296098      | 1Mb             | n/a                | Psychomotor delay, ASD                                          |
| DECIPHER   | 293228      | 4.7Mb           | n/a                | unknown                                                         |

All identified individuals with a hemizygous 2q24.1 (*NR4A2*) deletion in AGRE and the DECIPHER and ClinGen databases. n/a = no information available.

**Table S11. *WWOX* CNV and Individual Characteristics**

| <b>IID</b> | <b>CNV</b> | <b>Mbp</b> | <b>Status</b> | <b>Inheritance</b> | <b>Phenotype</b>                                                                                                  |
|------------|------------|------------|---------------|--------------------|-------------------------------------------------------------------------------------------------------------------|
| AU4112303  | Dup        | 77.6-78.1  | Affected      | Unknown            | SRS 85, Raven's NVIQ 97, can carry a conversation, tells friends from non-friends, no seizures                    |
| AU4010301  | Dup        | 78.0-78.5  | Affected      | Unknown            | SRS 71, Raven's NVIQ 85, no conversation, few words, no seizures                                                  |
| AU3381303  | Dup        | 80.0-78.6  | Affected      | Paternal           | SRS 98, Vineland 72, language delay, no seizures                                                                  |
| AU1141201  | Dup        | 78.9-79.4  | Affected      | Unknown            | SRS NA, no additional information, no seizures                                                                    |
| AU2488303  | Dup        | 78.0-78.5  | Affected      | Paternal           | Vineland 60, Raven's NVIQ 114, Stanford-Binet FSIQ 84, self-care, social interaction, good at school, no seizures |
| AU2607301  | Del        | 78.3-78.6  | Affected      | Maternal           | SRS 83, Ravens NVIQ 75, Stanford-Binet FSIQ 77, Vineland 81, no seizures                                          |
| AU2607302  |            |            |               |                    | SRS 86, Ravens NVIQ 85, Stanford-Binet FSIQ 90, Vineland 77, no seizures                                          |
| AU1993301  | Del        | 78.3-78.4  | Affected      | Maternal           | SRS NA, Raven's NVIQ 94, Stanford-Binet FSIQ 102, Asperger's/high-functioning, speech delay, no seizures          |
| AU1993302  |            |            |               |                    | SRS 96, Raven's NVIQ 90, Vineland 62, speech delay, OCD, mild intellectual disability, no seizures                |
| AU2073303  | Del        | 78.9-79.1  | Affected      | Maternal           | SRS NA, Stanford-Binet FSIQ 120, Vineland 80, Asperger's/high functioning, ADHD, delayed echolalia, no seizures   |
| 14415.p1   | Dup        | 77.7-78.4  | Affected      | Maternal           | SRS 76, PPVT 139, Vineland 79, no seizures                                                                        |
| 14415.s1   |            |            | Unaffected    |                    | SRS 52, IQ estimate NA, no seizures                                                                               |
| 13375.p1   | Dup        | 75.6-78.8  | Affected      | Paternal           | SRS 90, PPVT 85, Vineland 79, febrile seizures                                                                    |
| 14517.p1   | Del        | 77.7-78.4  | Affected      | Maternal           | SRS 90, PPVT 97, Vineland 64, infantile spasms                                                                    |
| 13199.p1   | Del        | 78.8-78.9  | Affected      | Maternal           | SRS 90, PPVT 107, Vineland 72, no seizures, mother has migraines                                                  |

All samples with 100kb CNVs in *WWOX* in AGRE are listed here with all the available phenotype information. Most individuals are in in normal IQ range, and values that indicate moderate to less severe phenotype. IID= Individual identifier, CNV= copy number variation type, Del = deletion, Dup = duplication, Status = affection status (affected/unaffected), Inheritance = inheritance pattern, parent of origin for the CNV, Phenotype = phenotype description: SRS = Social Responsiveness Scale normalized T value (parent evaluation), Raven's NVIQ = Raven's non-verbal intelligence quotient measurement, PPVT = Peabody Picture Vocabulary Test standardized score, FSIQ = full scale intelligence quotient measure, Vineland = Vineland adaptive behavior score.

## Supplementary References

- BUCAN, M., ABRAHAMS, B. S., WANG, K., GLESSNER, J. T., HERMAN, E. I., SONNENBLICK, L. I., ALVAREZ RETUERTO, A. I., IMIELINSKI, M., HADLEY, D., BRADFIELD, J. P., KIM, C., GIDAYA, N. B., LINDQUIST, I., HUTMAN, T., SIGMAN, M., KUSTANOVICH, V., LAJONCHERE, C. M., SINGLETON, A., KIM, J., WASSINK, T. H., MCMAHON, W. M., OWLEY, T., SWEENEY, J. A., COON, H., NURNBERGER, J. I., LI, M., CANTOR, R. M., MINSHEW, N. J., SUTCLIFFE, J. S., COOK, E. H., DAWSON, G., BUXBAUM, J. D., GRANT, S. F., SCHELLENBERG, G. D., GESCHWIND, D. H. & HAKONARSON, H. 2009. Genome-wide analyses of exonic copy number variants in a family-based study point to novel autism susceptibility genes. *PLoS Genet*, 5, e1000536.
- COLELLA, S., YAU, C., TAYLOR, J. M., MIRZA, G., BUTLER, H., CLOUSTON, P., BASSETT, A. S., SELLER, A., HOLMES, C. C. & RAGOSSIS, J. 2007. QuantiSNP: an Objective Bayes Hidden-Markov Model to detect and accurately map copy number variation using SNP genotyping data. *Nucleic Acids Res*, 35, 2013-25.
- GIRIRAJAN, S., DENNIS, M. Y., BAKER, C., MALIG, M., COE, B. P., CAMPBELL, C. D., MARK, K., VU, T. H., ALKAN, C., CHENG, Z., BIESECKER, L. G., BERNIER, R. & EICHLER, E. E. 2013. Refinement and discovery of new hotspots of copy-number variation associated with autism spectrum disorder. *Am J Hum Genet*, 92, 221-37.
- GLESSNER, J. T., WANG, K., CAI, G., KORVATSKA, O., KIM, C. E., WOOD, S., ZHANG, H., ESTES, A., BRUNE, C. W., BRADFIELD, J. P., IMIELINSKI, M., FRACKELTON, E. C., REICHERT, J., CRAWFORD, E. L., MUNSON, J., SLEIMAN, P. M., CHIAVACCI, R., ANNAIAH, K., THOMAS, K., HOU, C., GLABERSON, W., FLORY, J., OTIENO, F., GARRIS, M., SOORYA, L., KLEI, L., PIVEN, J., MEYER, K. J., ANAGNOSTOU, E., SAKURAI, T., GAME, R. M., RUDD, D. S., ZURAWIECKI, D., MCDOUGLE, C. J., DAVIS, L. K., MILLER, J., POSEY, D. J., MICHAELS, S., KOLEVZON, A., SILVERMAN, J. M., BERNIER, R., LEVY, S. E., SCHULTZ, R. T., DAWSON, G., OWLEY, T., MCMAHON, W. M., WASSINK, T. H., SWEENEY, J. A., NURNBERGER, J. I., COON, H., SUTCLIFFE, J. S., MINSHEW, N. J., GRANT, S. F., BUCAN, M., COOK, E. H., BUXBAUM, J. D., DEVLIN, B., SCHELLENBERG, G. D. & HAKONARSON, H. 2009. Autism genome-wide copy number variation reveals ubiquitin and neuronal genes. *Nature*, 459, 569-73.
- ILLUMINA. 2010a. *Interpreting Infinium® Assay Data for Whole-Genome Structural Variation* [Online]. Available: [http://res.illumina.com/documents/products/technotes/technote\\_cytoanalysis.pdf](http://res.illumina.com/documents/products/technotes/technote_cytoanalysis.pdf) [Accessed].
- ILLUMINA. 2010b. *Updated Cluster Generation Protocol for X Chromosome SNPs* [Online]. <http://www.illumina.com>. Available: [http://res.illumina.com/documents/products/technotes/technote\\_x\\_chromosome\\_snp\\_cluster\\_generation.pdf](http://res.illumina.com/documents/products/technotes/technote_x_chromosome_snp_cluster_generation.pdf) [Accessed].
- MATSUNAMI, N., HADLEY, D., HENSEL, C. H., CHRISTENSEN, G. B., KIM, C., FRACKELTON, E., THOMAS, K., DA SILVA, R. P., STEVENS, J., BAIRD, L., OTTERUD, B., HO, K., VARVIL, T., LEPPERT, T., LAMBERT, C. G., LEPPERT, M. & HAKONARSON, H. 2013. Identification of rare recurrent copy number

- variants in high-risk autism families and their prevalence in a large ASD population. *PLoS One*, 8, e52239.
- MILLER, D. T., SHEN, Y., WEISS, L. A., KORN, J., ANSELM, I., BRIDGEMOHAN, C., COX, G. F., DICKINSON, H., GENTILE, J., HARRIS, D. J., HEGDE, V., HUNDLEY, R., KHWAJA, O., KOTHARE, S., LUEDKE, C., NASIR, R., PODURI, A., PRASAD, K., RAFFALLI, P., REINHARD, A., SMITH, S. E., SOBEIH, M. M., SOUL, J. S., STOLER, J., TAKEOKA, M., TAN, W. H., THAKURIA, J., WOLFF, R., YUSUPOV, R., GUSELLA, J. F., DALY, M. J. & WU, B. L. 2009. Microdeletion/duplication at 15q13.2q13.3 among individuals with features of autism and other neuropsychiatric disorders. *J Med Genet*, 46, 242-8.
- MORENO-DE-LUCA, D., SANDERS, S. J., WILLSEY, A. J., MULLE, J. G., LOWE, J. K., GESCHWIND, D. H., STATE, M. W., MARTIN, C. L. & LEDBETTER, D. H. 2013. Using large clinical data sets to infer pathogenicity for rare copy number variants in autism cohorts. *Mol Psychiatry*, 18, 1090-5.
- MORROW, E. M., YOO, S. Y., FLAVELL, S. W., KIM, T. K., LIN, Y., HILL, R. S., MUKADDES, N. M., BALKHY, S., GASCON, G., HASHMI, A., AL-SAAD, S., WARE, J., JOSEPH, R. M., GREENBLATT, R., GLEASON, D., ERTELT, J. A., APSE, K. A., BODELL, A., PARTLOW, J. N., BARRY, B., YAO, H., MARKIANOS, K., FERLAND, R. J., GREENBERG, M. E. & WALSH, C. A. 2008. Identifying autism loci and genes by tracing recent shared ancestry. *Science*, 321, 218-23.
- PINTO, D., DELABY, E., MERICO, D., BARBOSA, M., MERIKANGAS, A., KLEI, L., THIRUVAHINDRAPURAM, B., XU, X., ZIMAN, R., WANG, Z., VORSTMAN, J. A., THOMPSON, A., REGAN, R., PILORGE, M., PELLECCIA, G., PAGNAMENTA, A. T., OLIVEIRA, B., MARSHALL, C. R., MAGALHAES, T. R., LOWE, J. K., HOWE, J. L., GRISWOLD, A. J., GILBERT, J., DUKETIS, E., DOMBROSKI, B. A., DE JONGE, M. V., CUCCARO, M., CRAWFORD, E. L., CORREIA, C. T., CONROY, J., CONCEICAO, I. C., CHIOCCHETTI, A. G., CASEY, J. P., CAI, G., CABROL, C., BOLSHAKOVA, N., BACCHELLI, E., ANNEY, R., GALLINGER, S., COTTERCHIO, M., CASEY, G., ZWAIGENBAUM, L., WITTEMEYER, K., WING, K., WALLACE, S., VAN ENGELAND, H., TRYFON, A., THOMSON, S., SOORYA, L., ROGE, B., ROBERTS, W., POUSTKA, F., MOUGA, S., MINSHEW, N., MCINNES, L. A., MCGREW, S. G., LORD, C., LEBOYER, M., LE COUTEUR, A. S., KOLEVZON, A., JIMENEZ GONZALEZ, P., JACOB, S., HOLT, R., GUTER, S., GREEN, J., GREEN, A., GILLBERG, C., FERNANDEZ, B. A., DUQUE, F., DELORME, R., DAWSON, G., CHASTE, P., CAFE, C., BRENNAN, S., BOURGERON, T., BOLTON, P. F., BOLTE, S., BERNIER, R., BAIRD, G., BAILEY, A. J., ANAGNOSTOU, E., ALMEIDA, J., WIJSMAN, E. M., VIELAND, V. J., VICENTE, A. M., SCHELLENBERG, G. D., PERICAK-VANCE, M., PATERSON, A. D., PARR, J. R., OLIVEIRA, G., NURNBERGER, J. I., MONACO, A. P., MAESTRINI, E., KLAUCK, S. M., HAKONARSON, H., HAINES, J. L., GESCHWIND, D. H., FREITAG, C. M., FOLSTEIN, S. E., ENNIS, S., et al. 2014. Convergence of genes and cellular pathways dysregulated in autism spectrum disorders. *Am J Hum Genet*, 94, 677-94.
- PINTO, D., PAGNAMENTA, A. T., KLEI, L., ANNEY, R., MERICO, D., REGAN, R., CONROY, J., MAGALHAES, T. R., CORREIA, C., ABRAHAMS, B. S., ALMEIDA, J., BACCHELLI, E., BADER, G. D., BAILEY, A. J., BAIRD, G., BATTAGLIA, A.,

- BERNEY, T., BOLSHAKOVA, N., BOLTE, S., BOLTON, P. F., BOURGERON, T., BRENNAN, S., BRIAN, J., BRYSON, S. E., CARSON, A. R., CASALLO, G., CASEY, J., CHUNG, B. H., COCHRANE, L., CORSELLO, C., CRAWFORD, E. L., CROSSETT, A., CYTRYNBAUM, C., DAWSON, G., DE JONGE, M., DELORME, R., DRMIC, I., DUKETIS, E., DUQUE, F., ESTES, A., FARRAR, P., FERNANDEZ, B. A., FOLSTEIN, S. E., FOMBONNE, E., FREITAG, C. M., GILBERT, J., GILLBERG, C., GLESSNER, J. T., GOLDBERG, J., GREEN, A., GREEN, J., GUTER, S. J., HAKONARSON, H., HERON, E. A., HILL, M., HOLT, R., HOWE, J. L., HUGHES, G., HUS, V., IGLIOZZI, R., KIM, C., KLAUCK, S. M., KOLEVZON, A., KORVATSKA, O., KUSTANOVICH, V., LAJONCHERE, C. M., LAMB, J. A., LASKAWIEC, M., LEBOYER, M., LE COUTEUR, A., LEVENTHAL, B. L., LIONEL, A. C., LIU, X. Q., LORD, C., LOTSPEICH, L., LUND, S. C., MAESTRINI, E., MAHONEY, W., MANTOULAN, C., MARSHALL, C. R., MCCONACHIE, H., MCDOUGLE, C. J., MCGRATH, J., MCMAHON, W. M., MERIKANGAS, A., MIGITA, O., MINSHEW, N. J., MIRZA, G. K., MUNSON, J., NELSON, S. F., NOAKES, C., NOOR, A., NYGREN, G., OLIVEIRA, G., PAPANIKOLAOU, K., PARR, J. R., PARRINI, B., PATON, T., PICKLES, A., PILORGE, M., et al. 2010. Functional impact of global rare copy number variation in autism spectrum disorders. *Nature*, 466, 368-72.
- SANDERS, S. J., ERCAN-SENCICEK, A. G., HUS, V., LUO, R., MURTHA, M. T., MORENO-DE-LUCA, D., CHU, S. H., MOREAU, M. P., GUPTA, A. R., THOMSON, S. A., MASON, C. E., BILGUVAR, K., CELESTINO-SOPER, P. B., CHOI, M., CRAWFORD, E. L., DAVIS, L., WRIGHT, N. R., DHODAPKAR, R. M., DICOLA, M., DILULLO, N. M., FERNANDEZ, T. V., FIELDING-SINGH, V., FISHMAN, D. O., FRAHM, S., GARAGALOYAN, R., GOH, G. S., KAMMELA, S., KLEI, L., LOWE, J. K., LUND, S. C., MCGREW, A. D., MEYER, K. A., MOFFAT, W. J., MURDOCH, J. D., O'ROAK, B. J., OBER, G. T., POTTENGER, R. S., RAUBESON, M. J., SONG, Y., WANG, Q., YASPAN, B. L., YU, T. W., YURKIEWICZ, I. R., BEAUDET, A. L., CANTOR, R. M., CURLAND, M., GRICE, D. E., GUNEL, M., LIFTON, R. P., MANE, S. M., MARTIN, D. M., SHAW, C. A., SHELDON, M., TISCHFIELD, J. A., WALSH, C. A., MORROW, E. M., LEDBETTER, D. H., FOMBONNE, E., LORD, C., MARTIN, C. L., BROOKS, A. I., SUTCLIFFE, J. S., COOK, E. H., JR., GESCHWIND, D., ROEDER, K., DEVLIN, B. & STATE, M. W. 2011. Multiple recurrent de novo CNVs, including duplications of the 7q11.23 Williams syndrome region, are strongly associated with autism. *Neuron*, 70, 863-85.
- WANG, K., LI, M., HADLEY, D., LIU, R., GLESSNER, J., GRANT, S. F., HAKONARSON, H. & BUCAN, M. 2007. PennCNV: an integrated hidden Markov model designed for high-resolution copy number variation detection in whole-genome SNP genotyping data. *Genome Res*, 17, 1665-74.
